# Supplementary material for: Investigating the ability of Rhodosporidium toruloides-1588 to use furfural as a carbon source and its degradation: an enzyme identification study
Source: Royal Society of Chemistry journal article supplement (doi:10.1039/d2se00772j), 2022-01-01
Supplement: d2se00772j1.pdf [file d2se00772j1.pdf]

## Supplementary Information

### ***Rhodosporidium toruloides*-1588 as a tool to biodegrade furfural as well as accumulate lipid and carotenoids: A enzyme identification study**

Rahul Saini<sup>1</sup>, Carlos Saul Osorio-Gonzalez<sup>1</sup>, Krishnamoorthy Hegde<sup>1</sup>, Satinder Kaur Brar<sup>1\*</sup> and Pierre Vezina<sup>2</sup>

<sup>1</sup>Department of Civil Engineering, Lassonde School of Engineering, York University, North York, Toronto, Ontario, Canada, M3J 1P3

<sup>2</sup>Director of Energy and the Environment, Council of the Quebec Forestry Industry, 1175 Avenue Lavigerie Suite 200, Quebec G1V 4P1, QC, Canada

\*Corresponding Author: [Satinder.Brar@lassonde.yorku.ca](mailto:Satinder.Brar@lassonde.yorku.ca)

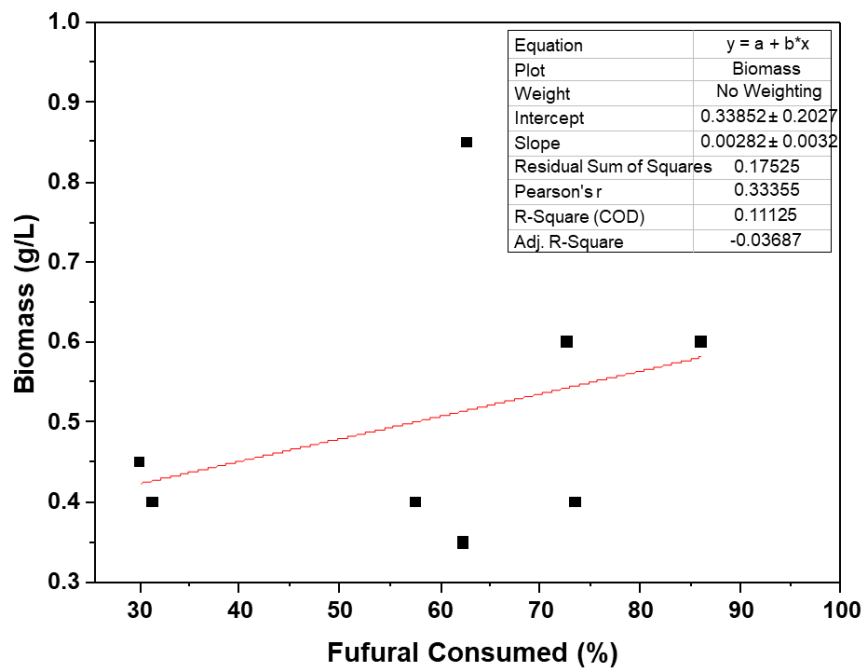

**Fig. S1.** Pearson correlation between furfural consumed (%) with respect to the biomass produced (g/L)

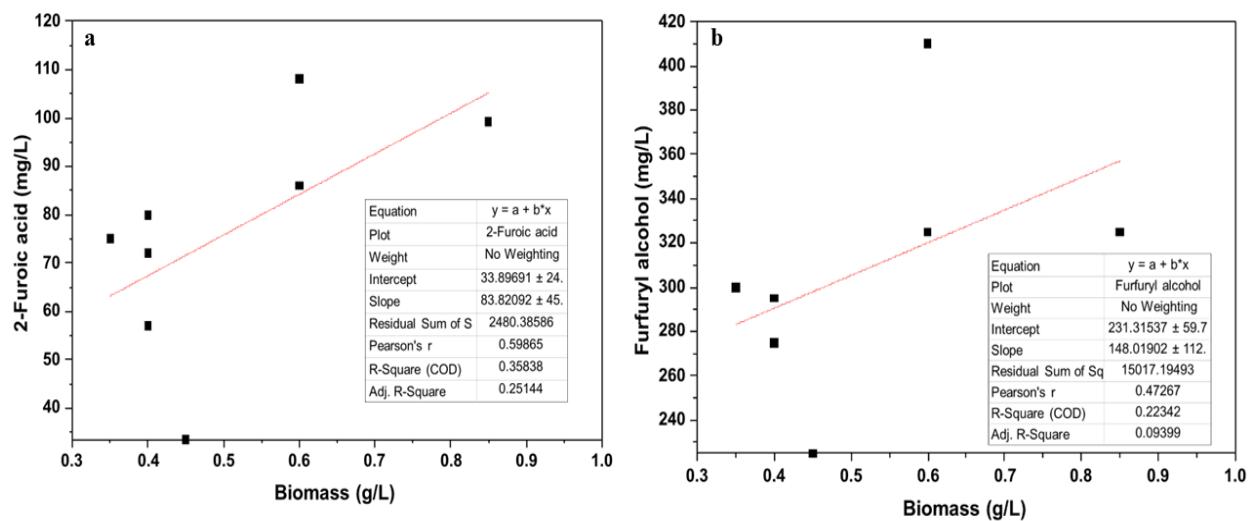

**Fig. S2.** Illustration of Pearson correlation between biomass with 2-furoic acid (2a) and furfuryl alcohol (2b) production.

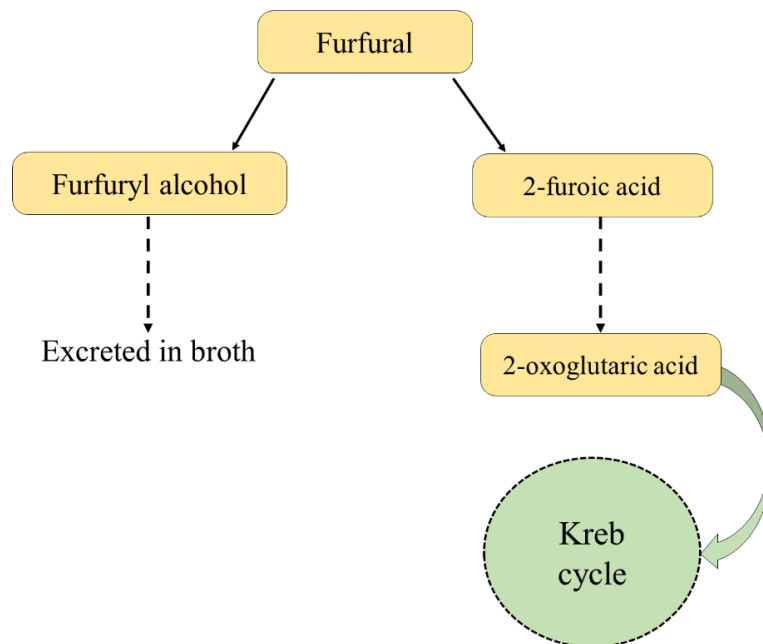

**Fig. S3.** Illustration of Furfural degradation pathway adapted from Nieves et al.<sup>1</sup>, Osorio Gonzalez et al.<sup>2</sup>, Wierckx et al.<sup>3</sup>.

**Table S1.** Peptide profile identified in the samples from glucose, furfural and furfural-glucose media using LCMS/MS and corresponding enzyme accession number from UniProt databank.

| S. No. | Enzyme                                           | UniProt ID | Molecular Weight (kDa) | Coverage (%) |
|--------|--------------------------------------------------|------------|------------------------|--------------|
| 1      | FGENESH: predicted gene_1.797 protein (Fragment) | A0A0K3CCP2 | 5.9                    | 42           |
| 2      | Nucleoside diphosphate kinase                    | A0A0K3CM94 | 16.5                   | 31           |
| 3      | Voltage-dependent ion-selective channel          | A0A0K3CMF3 | 30.6                   | 24           |
| 4      | ATP synthase subunit alpha                       | A0A0K3CJN0 | 56.4                   | 11           |
| 5      | Elongation factor 1-alpha                        | A0A0K3C7H5 | 48.7                   | 10           |
| 6      | 40S ribosomal protein s20                        | A0A061B3U3 | 13.7                   | 10           |
| 7      | Superoxide dismutase                             | A0A0K3CIK6 | 23.7                   | 8            |
| 8      | ADP/ATP translocase                              | A0A0K3C7I2 | 33.2                   | 6            |
| 9      | Citrate synthase                                 | A0A0K3CN89 | 50.2                   | 5            |
| 10     | Glyceraldehyde-3-phosphate                       | A0A0K3CP51 | 31.3                   | 5            |
| 11     | Peroxiredoxin                                    | A0A0K3CAW1 | 24.9                   | 5            |
| 12     | S-adenosylmethionine synthase                    | A0A0K3CCG4 | 41.4                   | 4            |
| 13     | Inorganic diphosphatase                          | A0A0K3CIY4 | 31.9                   | 3            |
| 14     | Heat shock protein 70 family                     | A0A0K3C908 | 70.8                   | 2            |
| 15     | Amine oxidase                                    | A0A0K3CAM7 | 87.5                   | 1            |
| 16     | ATP-citrate synthase                             | A0A0K3CJ29 | 125.7                  | 1            |

## References

1. L. M. Nieves, L. A. Panyon and X. Wang, *Frontiers in Bioengineering and Biotechnology*, 2015, **3**.
2. C. S. Osorio-González, K. Hegde, S. K. Brar, A. Kermanshahpour and A. Avalos-Ramírez, *Biofuel Boprod Bior*, 2018, **0**.
3. N. Wierckx, F. Koopman, H. J. Ruijsenaars and J. H. de Winde, *Appl. Microbiol. Biotechnol.*, 2011, **92**, 1095-1105.
